# Supplementary material
Source: PubMed Central journal article supplement (PMC2117843)
Supplement: jnnpsyc_jnnp.2006.104414_1.pdf [file jnnpsyc_jnnp.2006.104414_1.pdf]

## ONLINE ONLY “DATA SUPPLEMENT”

### References for table with cases’ details

- 1) Gallagher JP, Talbert OR. Motor neurone syndrome after electric shock. *Acta Neurol Scand* 1991;**83**:79-82.
- 2) Farrell DF, Starr A. Delayed neurological sequelae of electrical injuries. *Neurology* 1968;**18**:601-06.
- 3) Tashiro K, Inoue I, Ohyagi Y, *et al.* A case of motor neurone syndrome with onset 9 months after electrical injury. *Rinsho Shinkeigaku* 2000;**40**:732-35.
- 4) Saddler MC, Thomas JE. Temporary bulbar palsy following lightning strike. *Cent Afr J Med* 1990;**36**:161-62.
- 5) Ghosh D, Gupta A, Kohli A. Electrical injury: cervical myelopathy with late onset progressive motor neuron disease. *Aust N Z J Med* 1995;**25**:263-64.
- 6) Saha PK, Shenoy KT, Ravindran M. Unusual sequelae of electric shock. *J Assoc Physicians India* 1981;**29**:77-8.
- 7) Motor neurone disease database at Institute of Psychiatry, London
- 8) Kanitkar S, Roberts AHN. Paraplegia in an electrical burn: a case report. *Burns* 1988;**14**:49-50.
- 9) Breugem CC, Hertum WV, Groenevelt F. High voltage electrical injury leading to a delayed onset tetraplegia, with recovery. *Ann N Y Acad Sci* 1999;**30**:131-36.
- 10) Koller J, Orsagh J. Delayed neurological sequelae of high-tension electrical burns. *Burns* 1989;**15**:175-78.

- 11) Arevalo JM, Lorente JA, Balseiro-Gomez J. Spinal cord injury after electrical trauma treated in a burn unit. *Burns* 1999;**25**:449-52.
- 12) Bariar LM, Ahmad I, Aggarwal A, *et al.* Myelopathy following high voltage electrical injury: a case report. *Burns* 2002;**28**:699-700.
- 13) Varghese G, Mani MM, Redford JB. Spinal cord injuries following electrical accidents. *Paraplegia* 1986;**24**:159-66.
- 14) Christensen JA, Sherman RT, Balis GA, *et al.* Delayed neurologic injury secondary to high-voltage current, with recovery. *J Trauma* 1980;**20**:166-68.
- 15) Sharma M, Smith A. Paraplegia as a result of lightning injury. *Br Med J* 1978;**2**:1464-65.
- 16) Holbrook LA, Beach FXM, Silver JR. Delayed myelopathy: a rare complication of severe electrical burns. *Br Med J* 1970;**4**:659-60.
- 17) Ratnayke B, Emmanuel ER, Walker CC. Neurological sequelae following a high voltage electrical burn. *Burns* 1996;**22**:574-77.
- 18) Jackson FE, Martin R, Davis R. Delayed quadriplegia following electrical burn. *Mil Med* 1965;**130**:601-05.
- 19) Allan RN. Delayed neurological effects of electrical accidents [letter]. *Br Med J* 1969;**1**:383.
- 20) Kalita J, Jose M, Misra UK. Myelopathy and amnesia following accidental electrical injury. *Spinal Cord* 2002;**40**:253-55.
- 21) Levine NS, Atkins A, McKeel DW, *et al.* Spinal cord injury following electrical accidents: case reports. *J Trauma* 1975;**15**:459-63.

- 22) Deveci M, Bozkurt M, Sengezer M. Clonus: an unusual delayed neurological complication in electrical burn injury. *Burns* 2001;**27**:647-51.
- 23) Vincent FM. Spinal cord injury from electric current: a case report. *Arch Phys Med Rehabil* 1981;**62**:498-500.
- 24) So SC, Lee MLK. Spastic quadriplegia due to electric shock. *Br Med J* 1973;**2**:590.
- 25) Low YS. Delayed neurological manifestations secondary to electrical injury- a case report. *Singapore Med J* 1976;**17**:58-60.
- 26) Sirdofsky MD, Hawley RJ, Manz H. Progressive motor neuron disease associated with electrical injury. *Muscle Nerve* 1991;**14**:977-80.
- 27) Jafari H, Couratier P, Camu W. Motor neuron disease after electric injury. *J Neurol Neurosurg Psychiatry* 2001;**71**:265 -267.
- 28) Haynal VA, Regli F. Zusammenhang der amyotrophischen lateralsklerose mit gehauften elektrotraumata. *Confin Neurol* 1964;**24**:189-98.
- 29) Hoehl. Zur Kasuistik des elektrischen Traumas. *Munch Med Wschr* 1906;**53**:1276.
- 30) Panse F. Electrical Trauma. In Vinken PJ, Bruyn GW, eds. *Handbook of Clinical Neurology*. Amsterdam: North-Holland Publishing Company 1975;**23**:683-729.
- 31) Panse F. Die Neurologie des elektrischen Unfalls und des Blitzschlags, II. In: S.Koeppen and F. Panse, eds. *Klinische Elektropathologie* 1955 Thieme.
- 32) Grossmann R. Organisch-neurologische Syndrome nach Elektrotrauma. *Schweizer Archiv fur Neurologie und Psychiatrie* 1947;**58**:80-101.
