# Supplementary material
Source: PubMed Central journal article supplement (PMC2117843)
Supplement: jnnpsyc_jnnp.2006.104414_2.pdf [file jnnpsyc_jnnp.2006.104414_2.pdf]

**ONLINE ONLY "DATA SUPPLEMENT"**

**Table 1** Cases' details (Details of cases presenting with different syndromes following an electrical injury including lightning)

| Paper reference             | Patient number | Age at shock (yrs.) | Age at onset (yrs.) | Sex | Entry point | Exit point | Delay    | Site of onset | Diagnosis (as in papers)                          | Syndromes | Current strength        |
|-----------------------------|----------------|---------------------|---------------------|-----|-------------|------------|----------|---------------|---------------------------------------------------|-----------|-------------------------|
| Gallagher & Talbert, 1991   | 1              | 29                  | 33.5                | M   | N/A         | N/A        | 4.5 yrs  | N/A           | MND                                               | ALS/MND   | 20-25X10 <sup>3</sup> V |
|                             | 2              | 30                  | 32                  | M   | N/A         | N/A        | 2 yrs    | N/A           | MND                                               | ALS/MND   | 120 V                   |
|                             | 3              | 41                  | 43                  | M   | N/A         | N/A        | 2 yrs    | N/A           | MND                                               | ALS/MND   | 260 V                   |
|                             | 4              | 19                  | 22                  | M   | N/A         | N/A        | 3 yrs    | N/A           | MND                                               | ALS/MND   | 120 V                   |
|                             | 5              | 33                  | 36                  | M   | N/A         | N/A        | 3 yrs    | N/A           | MND                                               | ALS/MND   | 25,000 V                |
|                             | 6              | 20                  | 32                  | M   | N/A         | N/A        | 12 yrs   | N/A           | MND                                               | ALS/MND   | 10,000 V                |
|                             | 7              | 28                  | 43                  | M   | N/A         | N/A        | 15 yrs   | N/A           | MND                                               | ALS/MND   | 720 V                   |
|                             | 8              | 20                  | 36                  | M   | N/A         | N/A        | 16 yrs   | N/A           | MND                                               | ALS/MND   | 220 V                   |
|                             | 9              | 13                  | 30                  | M   | N/A         | N/A        | 17 yrs   | N/A           | MND                                               | ALS/MND   | 120 V                   |
|                             | 10             | 13                  | 31                  | M   | N/A         | N/A        | 18 yrs   | N/A           | MND                                               | ALS/MND   | 240 V                   |
|                             | 11             | 19                  | 43                  | M   | N/A         | N/A        | 24 yrs   | N/A           | MND                                               | ALS/MND   | 220 V                   |
|                             | 12             | 7                   | 37                  | M   | N/A         | N/A        | 30 yrs   | N/A           | MND                                               | ALS/MND   | 20,000 V                |
|                             | 13             | 10                  | 43                  | M   | N/A         | N/A        | 33 yrs   | N/A           | MND                                               | ALS/MND   | 220 V                   |
|                             | 14             | 7                   | 41                  | M   | N/A         | N/A        | 34 yrs   | N/A           | MND                                               | ALS/MND   | 120 V                   |
|                             | 15             | 21                  | 66                  | M   | N/A         | N/A        | 45 yrs   | N/A           | MND                                               | ALS/MND   | 120 V                   |
|                             | 16             | 20                  | 33.5                | M   | N/A         | N/A        | 13.5 yrs | N/A           | MND                                               | ALS/MND   | High V                  |
|                             | 17             | 20                  | 42                  | M   | N/A         | N/A        | 22 yrs   | N/A           | MND                                               | ALS/MND   | High V                  |
| Farrell & Starr, 1968       | 1              | 65                  | 67                  | M   | UL          | LL         | 2 yrs    | LL            | Neurogenic atrophy                                | NPS       | 18,000 V                |
| Tashiro et al., 2000        | 1              | 70                  | 72                  | M   | UL          | LL         | 2 yrs    | UL            | Motor neurone syndrome                            | NPS       | 20,000 V a.c.           |
| Saddler & Thomas, 1990      | 1              | 69.99               | 70                  | F   | N/A         | N/A        | 2 days   | Bulbar        | Temporary bulbar palsy                            | NPS       | N/A                     |
| Ghosh et al., 1995          | 1              | 22                  | 34                  | M   | UL          | N/A        | 12 yrs   | LL            | Progressive MND                                   | ALS/MND   | 440 V a.c.              |
| Saha et al., 1981           | 1              | 39.92               | 40                  | M   | UL          | N/A        | 1 mth    | LL            | Primary lateral sclerosis                         | PUS       | 230 V a.c.              |
| MND Database at IOP, London | 1              | 22.83               | 23                  | M   | UL          | N/A        | 2 mths   | UL            | Clinically definite ALS                           | ALS/MND   | N/A                     |
| Kanitkar & Roberts, 1988    | 1              | 18                  | 18                  | M   | Head        | N/A        | 0.5 day  | LL            | Paraplegic with UMN sign                          | NPS       | 25,000 V a.c.           |
| Bruegem et al., 1999        | 1              | 19.97               | 20                  | M   | Head        | LL         | 10 days  | LL            | Ascending paralysis leading on to tetraplegia     | NPS       | 15,000 V a.c.           |
| Koller & Orsagh, 1989       | 1              | 23.94               | 24                  | M   | N/A         | N/A        | 21 days  | LL            | Paraplegia (T12)                                  | NPS       | 3,000 V d.c.            |
|                             | 2              | 27.99               | 28                  | M   | N/A         | N/A        | 5 days   | LL            | Paraparesis                                       | NPS       | 3,000 V d.c.            |
|                             | 3              | 19.99               | 20                  | M   | N/A         | N/A        | 4 days   | N/A           | Quadriparalysis                                   | NPS       | 25,000 V a.c.           |
|                             | 4              | 47.95               | 48                  | M   | N/A         | N/A        | 20 days  | LL            | Paraparesis                                       | NPS       | 24,000 V a.c.           |
|                             | 5              | 19.99               | 20                  | M   | N/A         | N/A        | 5 days   | LL            | Paraparesis                                       | NPS       | 25,000 V a.c.           |
| Arevalo et al., 1999        | 1              | 38.96               | 39                  | F   | N/A         | N/A        | 2 wks.   | UL            | Cervical myelopathy                               | NPS       | 20,000 V                |
|                             | 2              | 14.98               | 15                  | M   | LL          | N/A        | 6 days   | N/A           | Pyramidal and posterior cord involvement          | NPS       | 10,000 V                |
| Bariar et al., 2002         | 1              | 40                  | 40                  | M   | LL          | N/A        | 1 day    | LL            | Pyramidal signs and weakness in LL                | NPS       | N/A                     |
| Varghese et al., 1986       | 1              | 18.99               | 19                  | M   | Head        | LL         | 2 days   | LL            | Spastic paraplegia                                | NPS       | 34,000 V                |
|                             | 2              | 65.98               | 66                  | M   | UL          | UL         | 7 days   | LL            | Quadriparalysis at C-7                            | NPS       | N/A                     |
|                             | 3              | 24.92               | 25                  | F   | N/A         | N/A        | 4 weeks  | LL            | Weakness in lower extremities                     | NPS       | N/A                     |
|                             | 4              | 65.98               | 66                  | M   | LL          | N/A        | 1 week   | LL            | Spastic paraparesis                               | NPS       | N/A                     |
|                             | 5              | 31.96               | 32                  | M   | N/A         | N/A        | 2 wks.   | N/A           | Weakness below C-7                                | NPS       | N/A                     |
| Christensen et al., 1980    | 1              | 21.99               | 22                  | F   | UL          | Head       | 5 days   | N/A           | Paraplegia progressing to quadriplegia            | NPS       | 7,200 V                 |
| Sharma & Smith, 1978        | 1              | 25                  | 25                  | M   | N/A         | N/A        | 1.5 days | LL            | Paraplegic (pyramidal)                            | NPS       | N/A                     |
| Holbrook et al., 1970       | 1              | 22.98               | 23                  | M   | UL          | N/A        | 8 days   | LL            | Spastic paraparesis leading on to quadriparalysis | NPS       | 33,000 V                |
| Ratnayke et al., 1996       | 1              | 22.92               | 23                  | M   | N/A         | N/A        | 4 wks.   | UL            | Paresis of left arm and both legs                 | NPS       | 20,000 V                |
| Jackson et al., 1964        | 1              | 10                  | 10                  | M   | UL          | LL         | 0        | N/A           | Flaccid and areflexic quadriparalysis             | NPS       | 75,000V                 |
| Allan, 1969                 | 1              | 61                  | 61                  | M   | N/A         | N/A        | 0        | UL            | Spasticity of right arm with absent UL reflexes   | NPS       | 240 V a.c.              |
| Kalita et al., 2002         | 1              | 30                  | 30                  | F   | UL          | N/A        | 1 day    | LL            | Spastic paraparesis                               | NPS       | 11,000 V a.c.           |
| Levine et al., 1975         | 1              | 34.99               | 35                  | M   | Head        | LL         | 2 days   | LL            | Transverse myelitis                               | NPS       | High V                  |
|                             | 2              | 21.83               | 22                  | M   | UL          | UL         | 2 mths.  | LL            | Weakness with hyperreflexia                       | NPS       | 2,200 V                 |
| Deveci et al., 2001         | 1              | 20.94               | 21                  | M   | Head        | N/A        | 3 wks.   | N/A           | Clonus                                            | NPS       | N/A                     |
|                             | 2              | 14.94               | 15                  | M   | UL          | LL         | 3 wks.   | LL            | Clonus                                            | NPS       | 20,000 V                |
|                             | 3              | 20.94               | 21                  | M   | UL          | LL         | 3 wks.   | N/A           | Clonus                                            | NPS       | 18,000 V                |
|                             | 4              | 20.94               | 21                  | M   | UL          | N/A        | 3 wks.   | N/A           | Clonus                                            | NPS       | High V                  |
| Vincent FM, 1981            | 1              | 25.88               | 26                  | M   | Head        | LL         | 6 wks    | N/A           | ALS like syndrome                                 | ALS/MND   | 3,200 V a.c.            |
| So & Lee, 1973              | 1              | 49                  | 49                  | M   | UL          | N/A        | 0.5 day  | UL            | ALS like syndrome                                 | NPS       | 220 V a.c.              |
| Low, 1976                   | 1              | 24                  | 26                  | M   | UL          | N/A        | 2 yrs    | UL            | Progressive spinal atrophy                        | ALS/MND   | 220 V                   |
| Sirdofsky et al., 1991      | 1              | 41.96               | 42                  | M   | UL          | LL         | 2 wks.   | UL            | Progressive MND                                   | ALS/MND   | 110 V a.c.              |
| Jafari et al., 2001         | 1              | 55.5                | 56                  | M   | UL          | LL         | 6 mths   | UL            | Progressive LMN disease                           | PLS       | N/A                     |
|                             | 2              | 41.42               | 42                  | M   | UL          | N/A        | 7 mths   | UL            | Probable ALS (spinal)                             | ALS/MND   | 380 V d.c.              |
|                             | 3              | 67.97               | 68                  | M   | UL          | N/A        | 10 days  | UL            | ALS (spinal)                                      | NPS       | 380 V                   |

|                      |                      |       |     |   |      |     |          |        |                                                  |         |                           |
|----------------------|----------------------|-------|-----|---|------|-----|----------|--------|--------------------------------------------------|---------|---------------------------|
|                      | 4                    | 48.67 | 50  | M | UL   | N/A | 16 mths. | UL     | Probable ALS (spinal)                            | ALS/MND | 380 V                     |
|                      | 5                    | 23    | 26  | M | LL   | N/A | 3 yrs    | LL     | Possible ALS (spinal)                            | ALS/MND | 380 V                     |
|                      | 6                    | 49    | 67  | F | UL   | LL  | 18 yrs   | N/A    | Bulbar ALS (definite)                            | ALS/MND | N/A                       |
| Haynal & Regli, 1964 | 1                    | N/A   | N/A | M | UL   | UL  | N/A      | UL     | ALS                                              | ALS/MND | Mx over 3 yrs             |
|                      | 2                    | N/A   | N/A | M | UL   | UL  | N/A      | UL     | ALS                                              | PLS     | 220-240 V (Mx)            |
|                      | 3                    | N/A   | N/A | M | UL   | UL  | N/A      | UL     | ALS                                              | ALS/MND | 380 V (Mx. over yrs.)     |
|                      | 4                    | N/A   | N/A | M | UL   | UL  | N/A      | Bulbar | ALS                                              | PLS     | 220 V(Mx. over yrs.)      |
|                      | 5                    | N/A   | N/A | M | UL   | UL  | N/A      | UL     | ALS                                              | ALS/MND | 220-380 V(Mx over 10 yrs) |
|                      | 6                    | N/A   | N/A | M | UL   | UL  | N/A      | Bulbar | ALS                                              | ALS/MND | Minor (Mx. over yrs.)     |
|                      | 7                    | N/A   | N/A | M | UL   | UL  | N/A      | UL     | ALS                                              | ALS/MND | 1 major and minor Mx.     |
|                      | 8                    | N/A   | N/A | M | UL   | UL  | N/A      | UL     | ALS                                              | ALS/MND | 220-500 V (Mx. over yrs.) |
|                      | 9                    | N/A   | N/A | M | UL   | UL  | N/A      | UL     | ALS                                              | PLS     | 220-300 V(Mx. over yrs.)  |
| Hoehl, 1906          | 1                    | 4.75  | 6   | M | UL   | N/A | 1.25 yrs | UL     | ALS                                              | ALS/MND | 220 V                     |
| Panse, 1975*         | 1(Buttiker)          | 55.92 | 56  | M | UL   | N/A | 4 wks.   | UL     | ALS ( <i>autopsy confirmed</i> )                 | ALS/MND | 1,000 V d.c               |
|                      | 2(Panse)             | 23.17 | 24  | M | UL   | LL  | 10 mths  | UL     | ALS                                              | ALS/MND | 220 V a.c                 |
|                      | 3(Karnosh)           | 38.92 | 39  | M | N/A  | N/A | 4 wks.   | LL     | Bulbar signs and flaccid legs                    | NPS     | 1,300 V a.c               |
|                      | 4(Linck)             | 51.58 | 52  | M | UL   | N/A | 5 mths   | LL     | ALS ( <i>autopsy confirmed</i> )                 | ALS/MND | 220 V                     |
|                      | 5(Alexander)         | 41.75 | 42  | M | Head | UL  | 3 mths   | N/A    | Nuclear atrophy and spasticity in all four limbs | NPS     | 13,800 V                  |
|                      | 6(Hegglin)           | 40.83 | 41  | M | UL   | N/A | 2 mths   | LL     | Severe ALS                                       | ALS/MND | 15,000 V a.c              |
|                      | 7(Zangger)           | N/A   | N/A | M | N/A  | N/A | 3 mths   | N/A    | Spastic amyotrophy                               | NPS     | N/A                       |
|                      | 8(Hyslop)            | 42.99 | 43  | M | LL   | N/A | 3 days   | UL     | ALS                                              | PLS     | 50-100 V                  |
|                      | 9(Jenny)             | N/A   | N/A | M | Head | LL  | N/A      | LL     | Spastic paraparesis with muscle atrophy          | NPS     | High Voltage              |
|                      | 10 (Paillas & Roger) | N/A   | N/A | F | UL   | LL  | N/A      | UL     | ALS                                              | ALS/MND | 600 V                     |
|                      | 11(Panse)            | 18.5  | 21  | M | UL   | N/A | 2.5 yrs  | UL     | ALS                                              | ALS/MND | 220 V                     |
|                      | 12 (Panse)           | 8     | 18  | M | UL   | LL  | 10 yrs   | LL     | ALS (slowly progressive)                         | ALS/MND | 220 V                     |
| Panse, 1955*         | 1(Leys)              | N/A   | N/A | M | N/A  | N/A | N/A      | UL     | Classical ALS                                    | ALS/MND | N/A                       |
|                      | 2(Caso)              | 52    | 53  | M | Head | N/A | 1 yr     | UL     | ALS                                              | ALS/MND | N/A                       |
|                      | 3 (Nistri)           | 51.75 | 52  | M | Head | N/A | 3 mths.  | UL     | ALS                                              | ALS/MND | N/A                       |
|                      | 4(Panse)             | 57.5  | 58  | M | UL   | N/A | 6 mths.  | UL     | Progressive spinal muscular atrophy              | PLS     | N/A                       |
| Grossmann, 1947      | 1                    | N/A   | N/A | M | UL   | LL  | N/A      | N/A    | Neurovegetative dystonie                         | NPS     | 500 V                     |
|                      | 2                    | N/A   | N/A | M | UL   | LL  | N/A      | UL     | Spinal lesion                                    | NPS     | 150-250 V                 |
|                      | 3                    | N/A   | N/A | M | UL   | LL  | N/A      | UL     | Neuritis (cervicobrachialis)                     | NPS     | 500 V                     |
|                      | 4                    | 55.92 | 56  | M | UL   | LL  | 4 wks.   | UL     | Late consequence                                 | NPS     | 380 V                     |
|                      | 5                    | 39    | 39  | M | UL   | UL  | 0        | UL     | Right arm neuritis                               | NPS     | 380 V                     |
|                      | 6                    | N/A   | N/A | M | N/A  | N/A | N/A      | N/A    | Temporary muscle atrophy                         | NPS     | N/A                       |
|                      | 7                    | 45.67 | 46  | M | UL   | UL  | 4 mths   | UL     | Spinal muscle atrophy                            | PLS     | 500 V                     |
|                      | 8                    | N/A   | N/A | M | UL   | UL  | N/A      | LL     | ALS ( <i>autopsy confirmed</i> )                 | ALS/MND | 15,000 V                  |
|                      | 9                    | N/A   | N/A | M | LL   | LL  | N/A      | UL     | Neurovegetative dystonie                         | NPS     | 15,000 V                  |

#### Keys for Table 1

UL= Upper Limb  
 LL= Lower Limb  
 LMN= Lower Motor Neurone  
 UMN= Upper Motor Neurone  
 LP= Lumbar Puncture  
 BR= Babinski Reflex  
 EMG= Electromyography  
 N/A= Not Available  
 yrs= years  
 mths= months  
 wks= weeks  
 a.c= alternating current  
 Mx= Multiple shocks  
 Current class: (1= <300 V; 2= 301-1000 V; 3= >1000 V; 4= lightning)  
 IOP= Institute of Psychiatry

LoC= Loss of Consciousness following electrical injury  
 Delay= Delay between electrical injury and the onset of a syndrome  
 Entry point= Entry point of the current  
 Exit point= Exit point of the current  
 Site of onset= Site of onset of the syndrome  
 Syndromes= Syndromes following electrical injury as according to our classification criteria  
 PUS= Progressive UMN syndrome  
 PLS= Progressive LMN syndrome  
 NPS= Non-progressive syndrome  
 ALS/MND= Amyotrophic Lateral Sclerosis/Motor Neurone Disease  
 V= Volts  
 d.c= direct current

\*Cases described are Panse's own patients as well as those cited in his papers from world literature with authors' names as in brackets

| Current class | Source of current | L.o.C | Comments/follow up/other information                |
|---------------|-------------------|-------|-----------------------------------------------------|
| 3             | TV tube           | N/A   | Thrown away after shock                             |
| 1             | Wall Outlet       | N/A   | Thrown away after shock                             |
| 1             | Water Heater      | N/A   | Thrown away after shock                             |
| 1             | Lamp Socket       | N/A   | N/A                                                 |
| 3             | TV Tube           | N/A   | Thrown 8 feet after shock                           |
| 3             | Power Line        | N/A   | Thrown away after shock                             |
| 2             | Electric Tool     | N/A   | Seized by current                                   |
| 1             | Wall Outlet       | N/A   | Thrown away after shock                             |
| 1             | Bare Wire         | N/A   | No reaction                                         |
| 1             | Wall Outlet       | N/A   | Thrown away after shock                             |
| 1             | Wall Outlet       | N/A   | Thrown away after shock                             |
| 3             | Electric Fence    | N/A   | Thrown away after shock                             |
| 1             | Wall Outlet       | N/A   | Thrown away 12 feet after shock                     |
| 1             | appl.cord         | N/A   | Thrown away after shock                             |
| 1             | Live Wiring       | N/A   | Mild shocks                                         |
| N/A           | Live Wiring       | N/A   | Mild shocks and thrown away                         |
| N/A           | Live Wiring       | N/A   | Mostly no reaction                                  |
| 3             | Electric Cable    | No    | 3 yrs. after trauma, course unchanged               |
| 3             | N/A               | N/A   | N/A                                                 |
| 4             | Lightning         | Yes   | Full recovery 36 days after the incident            |
| 2             | Electric Wire     | Yes   | Progressive MND after static disability for 11 yrs. |
| 1             | Electric Wire     | Yes   | Dysarthria seen in addition to UMN signs            |
| N/A           | Live Wire         | No    | Rapidly progressed                                  |
| 3             | Cable Wire        | No    | Gradual progressive recovery                        |
| 3             | Power Line        | Yes   | Full recovery in UL and partial recovery in LL      |
| 3             | Cable Wire        | N/A   | Partial recovery                                    |
| 3             | Cable Wire        | N/A   | Full recovery                                       |
| 3             | Cable Wire        | N/A   | Full recovery                                       |
| 3             | Cable Wire        | N/A   | Gradual recovery over 2 yrs.                        |
| 3             | Cable Wire        | N/A   | Full recovery                                       |
| 3             | N/A               | Yes   | Slow neurological improvement                       |
| 3             | N/A               | N/A   | Slow neurological improvement                       |
| N/A           | Tension Wire      | Yes   | Partial recovery                                    |
| 3             | Power Line        | N/A   | Partial recovery                                    |
| N/A           | Power Line        | N/A   | Very good recovery seen                             |
| N/A           | Power Line        | N/A   | Almost complete recovery                            |
| N/A           | Power Line        | N/A   | Complete recovery                                   |
| N/A           | Power Line        | N/A   | Almost complete neurological recovery               |
| 3             | High V wire       | N/A   | Recovery observed                                   |
| 4             | Lightning         | Yes   | Partial recovery during follow up                   |
| 3             | Electric Cable    | Yes   | By 160 days could mobilise with two sticks          |
| 3             | Power Cable       | Yes   | At 1 yr. follow up gradual recovery                 |
| 3             | Power Cable       | N/A   | Died 70 days post injury from respiratory failure   |
| 1             | Mains Supply      | Yes   | Over 6 wks. improvement with residual deficits      |
| 3             | Electric Wire     | Yes   | Recovery over 4 mths. with residual deficit         |
| 3             | Power Line        | No    | Died 3 mths. post injury of complications           |
| 3             | Power Line        | Yes   | Could walk with wide gait 6 mths. later             |
| 4             | Lightning         | Yes   | Clonus persisted over 4 yrs. follow up              |
| 3             | Wire              | Yes   | Clonus ceased after 1 yr.                           |
| 3             | Wire              | N/A   | Clonus persisted over 3 yrs. follow up              |
| 3             | Wire              | Yes   | Clonus ceased after 1yr.                            |
| 3             | Power Line        | Yes   | Slight improvement with baclofen                    |
| 1             | Live Wire         | Yes   | A non-progressive disease 2 yrs after accident      |
| 1             | Live Wire         | No    | N/A                                                 |
| 1             | House Circuit     | Yes   | Death occurred 33 mths. after electrical injury     |
| 4             | Lightning         | N/A   | Stable after 3 yrs.                                 |
| 2             | N/A               | N/A   | Slow progression after 3 yrs.                       |
| 2             | Cable Wire        | N/A   | Complete remission after 12 yrs.                    |

|     |               |               |                                                    |
|-----|---------------|---------------|----------------------------------------------------|
| 2   | Cable Wire    | N/A           | Slow progression                                   |
| 2   | Cable Wire    | N/A           | Died of respiratory failure after 107mths.         |
| 4   | Lightning     | N/A           | Died 26 mths. after onset                          |
| N/A | Electric Rail | N/A           | Progressed over 2 yrs. (Neurogenic atrophy)        |
| 1   | Wire          | Yes           | Progressed over 2 yrs. (Neurogenic atrophy)        |
| 2   | Wire          | N/A           | Progressed over 2 yrs. (Bulbar signs seen)         |
| 1   | Wire          | N/A           | Progressed over 2 yrs. (Bulbar signs observed)     |
| 2   | Wire          | No            | Progressed over 2 yrs. (Neurogenic atrophy)        |
| N/A | Wire          | N/A           | Progressed over 2 yrs. (Bulbar signs observed)     |
| N/A | Wire          | No            | Rapid progression over 2 yrs. (Bulbar signs seen)  |
| 2   | Wire          | N/A           | Rapid progression over 2 yrs.                      |
| 2   | Wire          | N/A           | Progressed over 2 yrs.                             |
| 1   | Power Line    | N/A           | Progressed over several yrs.                       |
| 2   | N/A           | No            | Death 7.5 yrs. after trauma                        |
| 1   | Socket        | No            | Completely helpless in 3 yrs.                      |
| 3   | N/A           | Yes           | Died 6 mths. after trauma                          |
| 1   | N/A           | No            | Death 4.5 yrs. afterwards                          |
| 3   | N/A           | Yes           | Died 1.5 yrs. or so afterwards                     |
| 3   | N/A           | N/A           | N/A                                                |
| N/A | N/A           | N/A           | Totally paralysed 20 yrs. after trauma             |
| 1   | Rail Line     | No            | Died 9 mths. after onset of disease                |
| N/A | Electric Unit | Yes with fits | Progressive disease seen at 4 yrs. after the shock |
| 2   | N/A           | No            | N/A                                                |
| 1   | Electric Wire | No            | ALS in end stage 9 yrs after trauma                |
| 1   | Electric Wire | Yes           | Slowly progressive ALS even 20 yrs. after trauma   |
| 4   | Lightning     | Yes           | End-stage ALS over 2.5 yrs. follow up              |
| 4   | Lightning     | Yes           | Progressive over 2 yr. follow up                   |
| 4   | Lightning     | Yes           | Rapidly progressive over 3 yrs.                    |
| 4   | Lightning     | No            | Died 11 mths. after the trauma due to aspiration   |
| 2   | Wire          | Yes           | No atrophy                                         |
| 1   | Wire          | Yes           | Non-progressive and partially reversible           |
| 2   | Wire          | No            | Non-progressive                                    |
| 2   | Electromotor  | No            | Non-progressive                                    |
| 2   | Wire          | Yes           | N/A                                                |
| 4   | Lightning     | Yes           | N/A                                                |
| 2   | Electromotor  | No            | Progressive with no UMN signs                      |
| 3   | Wire          | No            | Could not work at 2 mths. due to muscle wasting    |
| 3   | Wire          | No            | Muscle biopsy showed degenerative changes          |
